# Supplementary material for: The Prognostic and Predictive Utility of CDX2 in Colorectal Cancer
Source: Preprints.org preprint supplement (doi:10.20944/preprints202407.1687.v1), 2024-07-22
Supplement: Supplementary file 2 [file supplementary]

## Sheet: Export Summary
	This document was exported from Numbers. Each table was converted to an Excel spreadsheet. All other objects on each Numbers sheet were placed on separate work sheets. Please be aware that formula calculations may differ in Excel.
	Numbers Sheet Name	Numbers Table Name	Excel Spreadsheet Name
	2011
		Table 1	2011
	2010
		Table 1	2010
	2009
		Table 1	2009
	2008
		Table 1	2008
	2007
		Table 1	2007
	2006
		Table 1	2006
	2005
		Table 1	2005
	2004
		Table 1	2004
	2003
		Table 1	2003
	2002
		Table 1	2002
	2001
		Table 1	2001
	2000
		Table 1	2000

## Sheet: 2011
2011	R-CA00042	CDX2	1		2		3		4		5		6		7		8		9		10		Cancer - C
	CONTROL		NCT		NAT		CC		CC		CP		CP		LM		LM		P		ADE		Center - C
A	11-011028	Positive	5		5		5		5		5		5		5		5		NT		NT		Periphery - P
B	11-007944	Positive	5		5		5		5		5		5		5		5		NT		5		Normal - N	TV-ADE	MLH1MSH2MSH6PMS2+ ACPS Grade 2
C	11-006513	Positive	5		5		5		5		5		5		5		5		NT		NT		Close to To - CT		ACPS Grade B1
D	11-005239	Positive	5		5		5		5		5		5		NT		NT		5		NT		Away from To - AT	HP
E	11-004585	Positive	5		5		5		5		5		5		5		5		NT		NT		Lymph Node - L
F	11-003709	Positive	5		5		5		NT		5		5		NT		5		NT		NT		Metastasis - M		MLH1MSH2MSH6PMS2+
G	11-012419																						Adenoma - ADE	No Slides
H																							Polyp -P
NO	R-CA00043		1		2		3		4		5		6		7		8		9		10
	CONTROL		NCT		NAT		CC		CC		CP		CP		LM		LM		P		ADE
A	11-003148	Positive	5		NT		NT		5		NT		5		NT		NT		NT		NT				TRG2 Preop: RTx(Neoadjuvant Tx)
B	11-003063	Positive	5		5		5		5		5		5		NT		NT		NT		5				T-ADE
C	11-002805	Positive	5		NT		NT		5		5		5		NT		NT		NT		NT
D	*11-002404	Positive	5		NT		NT		5		5		3		5		NT		NT		NT		small LN	*Not Good Orientation	TV-ADE, Post neoadjuvant Tx
E	11-001727	Positive	5		5		5		NT		5		5		NT		NT		NT		NT				TRG3, Preop: RTxCTx
F	11-001647	Positive	5		5		5		5		5		5		5		5		NT		NT		Apical LN
G	11-001642	Positive	5		5		5		5		5		5		NT		NT		NT		NT
H

## Sheet: 2010
2010	R-CA00039	CDX2	1		2		3		4		5		6		7		8		9		10	Cancer - C
	CONTROL		NCT		NAT		CC		CC		CP		CP		LM		LM		P		ADE	Center - C
A	10-023474	Positive	2		5		5		5		5		2		NT		NT		NT		NT	Periphery - P
B	10-022415	Positive	5		5		NT		5		5		5		NT		NT		NT		NT	Normal - N
C	10-022116	Positive	5		5		5		5		5		5		NT		NT		NT		NT	Close to To - CT	Preope RadioTx
D	10-021648	Positive	5		5		5		5		5		5		NT		NT		NT		NT	Away from To - AT
E	10-021232	Positive	5		5		5		5		5		5		NT		NT		NT		NT	Lymph Node - L	TV-ADE
F	10-019530	Positive	5		5		NT		5		NT		NT		NT		NT		NT		NT	Metastasis - M	Preope Chemo, TRG2
G	10-017674	Positive	5		5		5		5		5		5		5		5		NT		5	Adenoma - ADE	TV-ADE
																						Polyp -P
NO	R-CA00040		1		2		3		4		5		6		7		8		9		10
	CONTROL		NCT		NAT		CC		CC		CP		CP		LM		LM		P		ADE
A	10-013210	Positive	NT		5		5		5		5		5		5		NT		NT		NT		TV-ADE
B	10-012615	Positive	5		5		NT		5		5		5		5		5		NT		NT
C	10-010915	Positive	1		5		5		5		4		4		5		5		NT		NT
D	10-006772	Positive	5		5		5		NT		NT		NT		NT		NT		NT		NT	Previous RadioTx	*Scant Tumour
E	10-005725	Positive	5		5		5		5		5		5		5		5		NT		NT	Preop Long Chemo Radio Tx	MLH1MSH2MSH6PMS2+
F	10-003739	Positive	5		5		5		5		5		5		NT		NT		NT		NT
G	10-000923	Positive	3		5		5		5		4		5		5		5		NT		NT
NO	R-CA00041		1		2		3		4		5		6		7		8		9		10
	CONTROL		NCT		NAT		CC		CC		CP		CP		LM		LM		P		ADE
A	10-019954	Positive	5		5		5		5		5		5		NT		NT		5		NT		V-ADE
B	10-016537	Positive	5		5		NT		5		5		5		NT		NT		NT		NT
C
D
E
F
G
H

## Sheet: 2009
2009	R-CA00036	CDX2	1		2		3		4		5		6		7		8		9		10		Cancer - C
	CONTROL		NCT		NAT		CC		CC		CP		CP		LM		LM		P		ADE		Center - C
A	09-021594	Positive	5		5		NT		5		5		5		NT		NT		NT		NT		Periphery - P		TV-ADE
B	09-020530	Positive	5		5		5		5		5		5		NT		5		NT		NT		Normal - N	09-021438 No Slides	Apical 1H,MLH1MSH2MSH6PMS2+
C	09-019894	Positive	NT		NT		5		5		5		5		NT		5		5		NT		Close to To - CT		V-ADE, Residual ADE
D	09-018965	Positive	5		5		5		NT		NT		NT		NT		NT		5		5		Away from To - AT	09-020328 No CA	T-ADE, Post ChemoTx
E	09-018635	Positive	5		5		5		5		5		5		NT		NT		NT		NT		Lymph Node - L		Preop RadioTx
F	09-018614	Positive	5		5		5		5		5		5		NT		NT		NT		NT		Metastasis - M	Preop short RadioTx	MLH1MSH2MSH6PMS2+
G	09-016289	Positive	5		5		5		5		5		5		NT		NT		5		NT		Adenoma - ADE	find 1J
H																							Polyp -P
NO	R-CA00037		1		2		3		4		5		6		7		8		9		10
	CONTROL		NCT		NAT		CC		CC		CP		CP		LM		LM		P		ADE
A	09-014297	Positive	5		5		5		5		5		5		5		5		NT		NT		Apical LN		MLH1MSH2MSH6PMS2+
B	09-013883	Positive	5		5		5		5		5		5		NT		NT		NT		5		ADE
C	09-013773	Positive	5		5		5		5		5		5		NT		NT		NT		NT
D	09-013565	Positive	5		5		1		5		3		1		NT		NT		NT		NT
E	09-012499	Positive	5		NT		5		5		5		5		NT		NT		NT		NT		TV-ADE		MLH1MSH2MSH6PMS2+
F	09-011464	Positive	5		5		5		5		5		5		5		5		NT		NT
G	09-011396	Positive	NT		5		5		5		5		5		NT		5		5		NT		HP
H
NO	R-CA00038		1		2		3		4		5		6		7		8		9		10
	CONTROL		NCT		NAT		CC		CC		CP		CP		LM		LM		P		ADE
A	09-006911	Positive	5		5		5		5		5		NT		NT		NT		NT		NT		09-010671	09-010888 No slides	MLH1MSH2MSH6PMS2+	HJKLMNP missing
B	09-006623	Positive	5		5		5		NT		5		5		NT		NT		NT		NT
C	09-005907	Positive	5		5		5		5		5		5		5		5		NT		NT		T-ADE		MLH1MSH2MSH6PMS2+
D	09-005396	Positive	5		5		5		5		5		5		NT		NT		NT		NT
E	09-000473	Positive	5		5		5		5		5		5		NT		NT		5		NT		T-ADE
F
G
H

## Sheet: 2008
2008	R-CA00033	CDX2	1		2		3		4		5		6		7		8		9		10		Cancer - C
	CONTROL		NCT		NAT		CC		CC		CP		CP		LM		LM		P		ADE		Center - C
A	08-024265	Positive	5		5		5		5		5		5		NT		NT		NT		4		Periphery - P	TV-ADE
B	08-023623	Positive	5		5		5		5		5		5		NT		NT		NT		NT		Normal - N	PMS2, MLH1, MSH2, MSH6 +
C	08-023530	Positive	5		5		5		5		5		5		5		5		NT		5		Close to To - CT	Lt Colon T-ADE
D	08-022839	Positive	5		5		5		5		5		5		NT		NT		NT		NT		Away from To - AT
E	08-022359	Positive	5		5		5		5		5		5		5		NT		NT		NT		Lymph Node - L
F	08-021867	Positive	5		5		5		5		5		5		NT		NT		NT		NT		Metastasis - M	PropRadioTx
G	08-021730	Positive	5		5		5		5		5		5		NT		NT		5		NT		Adenoma - ADE	HP
H																							Polyp -P
NO	R-CA00034		1		2		3		4		5		6		7		8		9		10
	CONTROL		NCT		NAT		CC		CC		CP		CP		LM		LM		P		ADE
A	08-020478	Negative	5		5		NT		1		NT		NT		NT		NT		NT		NT		TRG3	MLH1,MSH2,MSh6,PMS2+
B	08-019825	Positive	5		5		5		5		5		5		NT		NT		NT		NT		08-020202 Biopsy	Preopera RadioTX Long
C	08-018133	Positive	5		5		5		5		5		NT		NT		NT		NT		NT		08-019047 No Slides	Sigmoid CA
D	08-015188	Positive	5		5		5		5		5		5		NT		NT		NT		NT		08-018173 Biopsy	MLH1,MSH2,MSh6,PMS2+
E	08-014990	Positive	5		5		5		5		5		5		5		NT		NT		NT			LN small
F	08-012954	Positive	5		5		5		5		5		4		4		NT		NT		NT
G	08-012232	Positive	5		5		5		5		5		5		NT		NT		NT		NT
H
NO	R-CA00035		1		2		3		4		5		6		7		8		9		10
	CONTROL		NCT		NAT		CC		CC		CP		CP		LM		LM		P		ADE
A	08-010974	Positive	5		5		5		5		5		5		NT		NT		NT		5			TV-ADE
B	08-006894	Positive	5		5		5		5		5		5		NT		NT		NT		NT
C	08-006099	Positive	5		5		5		NT		5		5		NT		NT		NT		NT			Preoper Chemo
D	08-005497	Positive	5		5		5		5		5		5		NT		NT		5		NT			HP
E	08-004343	Positive	5		5		5		5		5		5		5		5		NT		NT			Preoper Neoadjuvant Tx
F	08-002907	Positive	5		5		5		5		5		5		5		5		NT		NT
G																							08-002881 Biopsy
H

## Sheet: 2007
2007	R-CA00027	CDX2	1		2		3		4		5		6		7		8		9		10		Cancer - C
	CONTROL		NCT		NAT		CC		CC		CP		CP		LM		LM		P		ADE		Center - C
A	07-023377	Positive	5		5		5		5		NT		2		NT		NT		NT		NT		Periphery - P	MLH1,PMS2,MSH2,MSH6 +
B	07-022781	Positive	NT		5		5		5		5		5		NT		NT		NT		NT		Normal - N	V ADE
C	07-022696	Positive	5		5		5		5		5		5		NT		NT		NT		NT		Close to To - CT
D	07-019835	Positive	5		5		NT		NT		5		5		5		NT		NT		NT		Away from To - AT	HP
E	07-019755	Positive	5		5		5		5		5		5		NT		5		NT		NT		Lymph Node - L	Apical LN
F	07-019072	Positive	5		5		5		5		5		5		NT		NT		NT		NT		Metastasis - M
G	07-018062	Positive	5		5		5		NT		NT		5		NT		NT		NT		NT		Adenoma - ADE	T ADE
																							Polyp -P
NO	R-CA00028		1		2		3		4		5		6		7		8		9		10
	CONTROL		NCT		NAT		CC		CC		CP		CP		LM		LM		P		ADE
A	07-016407	Positive	NT		5		5		5		5		NT		NT		NT		NT		NT		07-017581 No CA	T ADE
B	07-015300	Positive	5		NT		NT		NT		4		NT		NT		NT		NT		NT		Preope: Short RadioTx	TRG2
C	07-015281	Positive	NT		NT		NT		NT		5		5		5		NT		NT		NT		Neoadjuvant RadioTx
D	07-014576	Negative	NS		1		2		NT		5		5		3		NT		NT		5			HP
E	07-012107	Positive	NS		NT		NT		5		5		5		NT		NT		NT		5			T ADE
F	07-011023	Positive	5		NT		5		NT		3		NT		NT		NT		NT		NT
G	07-010436	Positive	NT		5		NT		NT		NT		NT		5		NT		NT		NT		07-011611 Stomach CA
NO	R-CA00029		1		2		3		4		5		6		7		8		9		10
	CONTROL		NCT		NAT		CC		CC		CP		CP		LM		LM		P		ADE
A	07-010158	Positive	5		5		5		5		5		5		5		5		NT		NT			Apical LN
B	07-008890	Positive	5		5		5		5		5		5		NT		NT		NT		NT		Preope Short RadioTX	Rectum
C	07-008890	Positive	5		5		5		5		5		5		NT		NT		NT		NT		Synchronous Sigmoid CA
D	07-008635	Positive	5		5		NT		5		5		5		NT		NT		NT		NT		07-009207 No slides
E	07-008381	Positive	5		5		5		5		5		5		NT		NT		NT		5		TV ADE
F	07-007169	Positive	5		5		5		5		5		5		NT		NT		NT		NT		07-007569 No slides	K Ras Ex 2 Mutation
G	07-006947	Positive	5		5		5		5		5		5		5		5		NT		NT		Apical LN
H
NO	R-CA00030		1		2		3		4		5		6		7		8		9		10
	CONTROL		NCT		NAT		CC		CC		CP		CP		LM		LM		P		ADE
A	07-006748	Positive	5		5		5		5		5		5		5		5		NT		5		T-ADE
B	07-006336	Positive	5		5		5		5		5		5		NT		NT		NT		NT
C	07-006298	Positive	5		5		5		5		5		5		5		5		NT		NT		HP
D	07-005763	Positive	5		5		5		5		5		5		NT		NT		NT		NT
E	07-005273	Positive	5		5		5		5		5		5		NT		NT		5		5		HP, T ADE
F	07-004190	Positive	5		5		5		5		5		5		5		5		NT		NT
G	07-003838	Positive	5		5		5		5		5		5		5		5		NT		NT		Preope:RadioRx
H
NO	R-CA00031		1		2		3		4		5		6		7		8		9		10
	CONTROL		NCT		NAT		CC		CC		CP		CP		LM		LM		P		ADE
A	07-003652	Positive	2		5		5		5		3		3		5		5		NT		NT		Apical LN
B	07-003200	Positive	NT		5		5		5		5		5		NT		NT		NT		NT		07-003345 -Biopsy
C	07-002946	Positive	5		5		5		5		5		5		5		5		NT		NT		07-003346 - Biopsy
D	07-002681	Positive	5		5		5		5		5		5		NT		NT		3		5		07-002863 NO Slides	HP, TV-ADE
E	07-002430	Positive	5		5		5		5		5		5		5		5		NT		NT
F	07-001365	Positive	5		5		3		5		5		5		5		5		3		NT		HP
G	07-000879	Positive	5		5		5		5		5		5		5		5		NT		5		1E contiguous V-ADE	T-ADE
H
NO	R-CA00032		1		2		3		4		5		6		7		8		9		10
	CONTROL		NCT		NAT		CC		CC		CP		CP		LM		LM		P		ADE
A	07-000998	Positive	5		5		5		5		5		5		5		5		NT		NT
B	07-000705	Positive	5		5		5		5		5		5		5		NT		NT		NT		PreoperRadio/Chemo
C	07-000539	Positive	NT		5		5		5		5		5		NT		NT		NT		5
D	07-010468	Positive	5		5		5		5		5		5		5		5		NT		NT
E	07-013508	Positive	5		5		5		5		5		5		5		5		NT		NT
F	07-013650	Positive	5		5		5		5		5		5		NT		NT		NT		5		T-ADE
G
H

## Sheet: 2006
2006	R-CA00021	CDX2	1		2		3		4		5		6		7		8		9		10		Cancer - C
	CONTROL		NCT		NAT		CC		CC		CP		CP		LM		LM		P		ADE		Center - C
A	06-023788	Positive	5		5		5		NT		5		NT		NT		NT		NT		NT		Periphery - P	Neoadjuvant RXT
B	06-023451	Positive	NT		5		5		5		5		NT		NT		NT		NT		NT		Normal - N
C	06-022011	Positive	5		5		5		5		5		5		5		NT		NT		NT		Close to To - CT
D	06-021323	Positive	2		5		5		5		NT		5		NT		NT		NT		NT		Away from To - AT	06-021532 -No T/s Blocks
E	06-020477	Positive	3		5		5		5		5		5		5		5		NT		NT		Lymph Node - L
F	06-019628	Positive	5		5		5		5		5		5		NT		NT		NT		NT		Metastasis - M	06-020518-1 Slides,3 Blocks
G	06-019210	Negative	5		5		1		1		1		1		NT		NT		5		5		Adenoma - ADE	TV-ADE,1N Block Missing
H																							Polyp -P	06-019916 - No Slides
NO	R-CA00022		1		2		3		4		5		6		7		8		9		10
	CONTROL		NCT		NAT		CC		CC		CP		CP		LM		LM		P		ADE
A	06-018536	Positive	5		5		3		4		5		5		5		4		NT		5		V-ADE
B	06-016823	Positive	4		5		5		5		5		5		NT		NT		NT		5		06-018495-DXT changes
C	06-015926	Positive	5		5		5		5		5		5		NT		NT		5		5		06-017353-DXT effect	Hyperplastic/TV-ADE
D	06-015259	Positive	5		5		5		5		5		5		NT		NT		NT		NT
E	06-013215	Positive	2		5		5		5		5		5		NT		NT		NT		NT		06-016647-No Slides
F	06-012809	Positive	1		5		5		5		5		5		1		1		NT		5		06-016601-Colon CA	06-012900- Biopsy Block, TV-ADE
G	06-012379	Positive	NT		5		5		5		5		5		5		NT		NT		NT
H
NO	R-CA00023		1		2		3		4		5		6		7		8		9		10
	CONTROL		NCT		NAT		CC		CC		CP		CP		LM		LM		P		ADE
A	06-012310	Positive	5		5		5		5		5		5		5		5		NT		NT
B	06-012307	Positive	5		5		5		5		5		5		NT		NT		NT		NT
C	06-010331	Positive	5		5		5		NT		5		5		NT		5		NT		NT		06-012223 Biopsy Block
D	06-008134	Positive	5		5		5		5		5		5		5		5		NT		NT		06-010539 Biopsy Block
E	06-007837	Positive	5		5		5		5		5		5		5		5		NT		5		T-ADE	MLH1,PMS2,MSH2,MSH6+
F	06-007373	Positive	5		5		NT		NT		2		NT		NT		NT		NT		NT
G	06-006973	Positive	5		5		5		5		5		5		NT		5		NT		NT
H
NO	R-CA00024		1		2		3		4		5		6		7		8		9		10
	CONTROL		NCT		NAT		CC		CC		CP		CP		LM		LM		P		ADE
A	06-006118	Positive	5		5		5		5		5		5		NT		NT		5		NT		06-006971- No SLides
B	06-006083	Positive	5		NT		5		5		5		5		5		NT		NT		NT		06-006763- No Slides
C	06-005880	Positive	5		5		5		5		5		5		5		5		NT		5		T-ADE
D	06-004805	Positive	5		5		5		5		5		5		5		5		NT		NT
E	06-004061	Positive	5		5		5		5		5		5		NT		NT		NT		NT
F	06-003803	Positive	5		5		5		5		5		5		5		5		NT		NT
G	06-003106	Positive	5		5		5		5		5		5		5		5		2		2		T-ADE
NO	R-CA00025		1		2		3		4		5		6		7		8		9		10
	CONTROL		NCT		NAT		CC		CC		CP		CP		LM		LM		P		ADE
A	06-002963	Positive	5		5		5		NT		5		5		NT		NT		NT		NT		HP
B	06-001946	Negative	NT		5		1		2		1		2		3		2		5		5		Apical LN, T-ADE
C	06-000416	Positive	5		5		5		5		5		5		NT		NT		NT		5		V-ADE
D	06-000406	Positive	5		5		5		5		5		5		NT		NT		NT		NT		T-ADE
E	06-000332	Positive	5		5		5		NT		5		5		NT		NT		5		NT		HP
F	06-016601	Positive	5		5		5		5		5		5		NT		NT		NT		NT		SB&LO,No CA in Rectum
G	06-016647	Positive	5		5		3		NT		5		5		NT		NT		NT		NT		Radiation Changes
NO	R-CA00026		1		2		3		4		5		6		7		8		9		10
	CONTROL		NCT		NAT		CC		CC		CP		CP		LM		LM		P		ADE
A	06-017353	Positive	5		5		5		NT		5		NT		NT		NT		NT		NT		RXT Effects
B	06-018495	Positive	5		5		5		5		5		5		NT		NT		NT		NT		RXT Changes
C	06-019916	Positive	5		5		5		5		5		5		5		5		NT		NT		?Preope: DXT
D	06-006971	Positive	5		5		5		5		5		5		NT		NT		NT		NT		Preope: ChemoRadio
E	06-006763	Positive	5		5		5		5		5		5		NT		NT		NT		NT
F	06-021532	Positive	5		5		5		NT		5		5		NT		NT		NT		5		T-ADE
G
H

## Sheet: 2005
2005	R-CA00019	1		2		3		4		5		6		7		8		9		10		Cancer - C
	CONTROL	NCT		NAT		CC		CC		CP		CP		LM		LM		P		ADE		Center - C
A	05-023169	1		5		5		2		1		2		NT		NT		NT		NT		Periphery - P	T-ADE
B	05-023168	NT		5		5		5		5		5		5		3		NT		NT		Normal - N
C	05-023118	1		5		2		1		4		5		5		5		NT		NT		Close to To - CT	Apical LN
D	05-022023	5		5		5		5		5		5		NT		NT		NT		NT		Away from To - AT	05-022359 Tissue Biopsy Block
E	05-021831	5		5		5		5		5		5		NT		NT		NT		NT		Lymph Node - L	TV-ADE
F	05-021503	5		5		5		5		5		5		NT		NT		NT		NT		Metastasis - M
G	05-021215	5		5		5		5		5		5		NT		NT		5		NT		Adenoma - ADE	Hyperplastic
H																						Polyp -P
NO	R-CA00020	1		2		3		4		5		6		7		8		9		10
	CONTROL	NCT		NAT		CC		CC		CP		CP		LM		LM		P		ADE
A	05-020662	5		5		5		5		5		5		5		5		NT		5		V-ADE
B
C
D
E
F
G
H
	C:\Program Files\etax2012\

## Sheet: 2004
2004	R-CA00044	1		2		3		4		5		6		7		8		9		10		Cancer - C
	CONTROL	NCT		NAT		CC		CC		CP		CP		LM		LM		P		ADE		Center - C	T-ADE
A	04-000489	5		5		5		5		5		5		NT		NT		5		NT		Periphery - P	04-000348 Biopsy
B	04-001854	5		NT		5		5		5		5		NT		NT		5		5		Normal - N	04-000455 Biopsy	04-000895 No Report	HP, T-ADE
C	04-002346	5		5		5		5		5		5		NT		NT		NT		5		Close to To - CT	04-000456 Biopsy	T-ADE
D	04-003509	5		5		5		5		5		5		NT		NT		NT		NT		Away from To - AT	HP
E	04-006742	5		5		5		5		5		5		NT		NT		NT		NT		Lymph Node - L
F	04-007500	5		5		5		5		5		5		NT		NT		NT		NT		Metastasis - M	TV-ADE
G	04-008475	5		5		5		5		5		5		5		5		NT		NT		Adenoma - ADE
H																						Polyp -P
NO	R-CA00045	1		2		3		4		5		6		7		8		9		10
	CONTROL	NCT		NAT		CC		CC		CP		CP		LM		LM		P		ADE
A	04-009149	5		NT		5		5		5		5		5		5		NT		NT		04-005359 Biopsy
B	04-009342	5		5		5		5		5		5		5		5		NT		5		04-005400 Biopsy	T-ADE
C	04-009437	5		5		3		4		4		5		NT		NT		5		5		04-005770 Biopsy	HP,T-ADE
D	04-011471	5		5		5		5		5		5		5		5		NT		NT		04-005771 Biopsy
E	04-011628	5		5		5		5		1		NT		NT		NT		NT		NT		04-006304 Biopsy	Preope ChemoRadio Tx
F	04-012788	5		5		4		5		4		5		NT		NT		NT		NT		04-006506 No slides
G	04-014075	5		5		5		5		5		5		NT		5		NT		NT		04-006617 No slides
H																						04-007097 Biopsy
NO	R-CA00046	1		2		3		4		5		6		7		8		9		10
	CONTROL	NCT		NAT		CC		CC		CP		CP		LM		LM		P		ADE				04-000895 No Report
A	04-020159	5		5		5		5		5		5		5		5		NT		NT		04-007118 Biopsy
B	04-020883	5		5		5		NT		5		NT		NT		NT		NT		NT		04-008188 Biopsy		04-006506 No slides
C	04-021350	3		4		5		4		5		3		NT		NT		NT		NT		04-008244 Biopsy		04-006617 No slides
D	04-015878	5		5		NT		5		5		5		NT		NT		NT		NT		04-009702 No Slides		04-009702 No Slides
E																						04-012198 No slides		04-012198 No slides
F																						04-015342 Biopsy		04-020293 No slides
G																						04-015836 Biopsy
H																						04-016655 Biopsy

## Sheet: 2003
2003	R-CA00016	1		2		3		4		5		6		7		8		9		10		Cancer - C
	CONTROL	NCT		NAT		CC		CC		CP		CP		LM		LM		P		ADE		Center - C	03-1899 No Report
A	03-000876	5		5		5		5		5		5		NT		NT		NT		NT		Periphery - P
B	03-002386	NT		5		5		5		5		5		NT		NT		NT		NT		Normal - N
C	03-002854	NT		5		5		5		5		5		NT		NT		NT		NT		Close to To - CT	Prior DXT
D	03-003329	5		5		5		5		5		5		NT		NT		NT		NT		Away from To - AT
E	03-003433	5		5		5		5		NT		NT		NT		NT		5		NT		Lymph Node - L	Post DXT, Sessile polyp
F	03-004520	4		5		5		5		5		5		NT		NT		NT		NT		Metastasis - M	03-4404 No report
G	03-005139	5		5		4		4		5		5		NT		NT		5		5		Adenoma - ADE	T-ADE
H	03-005619	4		5		5		5		5		5		NT		NT		5		NT		Polyp -P	MSI-H	BCH
NO	R-CA00017	1		2		3		4		5		6		7		8		9		10
	CONTROL	NCT		NAT		CC		CC		CP		CP		LM		LM		P		ADE
A	02-000948	5		NT		NT		5		5		NT		NT		NT		NT		NT		SRC-CA	MSH2-,MLH1+	BCH
B	03-005902	5		5		1		5		5		5		2		1		3		NT		Hyperplastic Polyp
C	03-006130	5		5		5		5		5		5		NT		NT		NT		NT
D	03-006547	5		5		1		1		1		1		1		1		NT		NT
E	03-006822	5		5		5		5		5		5		5		5		NT		5		contiguous V-ADE
F	03-007586	3		5		5		5		5		5		NT		NT		NT		5		T-ADE
G	03-008051	5		5		5		5		5		5		5		5		NT		5		1G-Apical LN
H
NO	R-CA00018	1		2		3		4		5		6		7		8		9		10
	CONTROL	NCT		NAT		CC		CC		CP		CP		LM		LM		P		ADE
A	03-008315	5		5		NT		5		5		5		NT		NT		NT		NT		T-ADE
B	03-08316	5		5		5		5		5		5		5		5		NT		NT
C	03-008783	5		5		5		5		5		5		5		5		NT		NT
D	03-009529	5		5		5		5		5		5		5		5		NT		NT
E	03-009640	NT		5		5		5		5		5		NT		NT		4		5		T-ADE
F	03-010301																					No Report
G	03-010417	5		5		5		5		5		5		NT		NT		NT		NT
H

[truncated: 3 more sheets: 2002, 2001, 2000]
